# Supplementary material for: Identifying recombinants in human and primate immunodeficiency virus sequence alignments using quartet scanning
Source: PubMed Central journal article supplement (PMC2684544; doi:10.1186/1471-2105-10-126), 2009-04-27
Supplement: 1471-2105-10-126-S1.pdf [file 1471-2105-10-126-S1.pdf]

**Additional Table A1. HIV and SIV Sequence data.**

| Database: Accession number | HIV-1 subtype or CRF |
|----------------------------|----------------------|
| GenBank:M62320.1           | A1                   |
| Genbank:AF286238.1         | A2                   |
| Genbank:AY521629.1         | A3                   |
| EMBL:AM000054.1            | A4                   |
| EMBL:AJ006287.1            | B                    |
| Genbank:M17449.1           | B                    |
| Genbank:M17451.1           | B                    |
| Genbank:U26546.1           | B                    |
| Genbank:AF286228.1         | C                    |
| Genbank:DQ396370.1         | C                    |
| Genbank:AF286234.1         | C                    |
| Genbank:AF286227.1         | C                    |
| Genbank:U88824.1           | D                    |
| Genbank:M27323.1           | D                    |
| Genbank:K03454.1           | D                    |
| Genbank:U88822.1           | D                    |
| Genbank:AF005494.1         | F1                   |
| EMBL:AJ249238.1            | F1                   |
| EMBL:AJ249236.1            | F2                   |
| EMBL:AJ249237.1            | F2                   |
| Genbank:AF084936.1         | G                    |
| Genbank:U88826.1           | G                    |
| Genbank:AF061642.1         | G                    |
| Genbank:AF061641.1         | G                    |
| Genbank:AF190127.1         | H                    |
| Genbank:AF190128.1         | H                    |
| Genbank:AF005496.1         | H                    |
| Genbank:AF082395.1         | J                    |
| Genbank:AF082394.1         | J                    |
| EMBL:AJ249239.1            | K                    |

|                  |          |
|------------------|----------|
| EMBL:AJ249235.1  | K        |
| Genbank:AY125894 | CRF01_AE |
| Genbank:AF197340 | CRF01_AE |
| DDBJ:AB052995    | CRF01_AE |
| Genbank:AY008714 | CRF01_AE |
| Genbank:L39106   | CRF02_AG |
| EMBL:AJ251056    | CRF02_AG |
| Genbank:AY271690 | CRF02_AG |
| Genbank:AF377955 | CRF02_AG |
| Genbank:AF414006 | CRF03_AB |
| Genbank:AF193276 | CRF03_AB |
| Genbank:AF286236 | U        |
| Genbank:AF457101 | U        |

---

| Database: Accession number | PIV strain |
|----------------------------|------------|
| Genbank: AF103818          | SIVcpzUS   |
| Genbank:AF447763           | SIVcpzTAN1 |
| Genbank:AF468658           | SIVgsn71   |
| Genbank:AF468659           | SIVgsn166  |
| Genbank:U72748             | SIVsm543   |
| EMBL:X61240                | HIV2D205   |
| Genbank:M29975             | SIVagm155  |
| Genbank:U58991             | SIVagmTAN1 |
| Genbank:AF349680           | SIVrcmNigM |
| Genbank: AF382829          | SIVrcmGB1  |
| Genbank:M27470             | SIVmndGB1  |
| Genbank:AF301156           | SIVcolCGU  |
| Genbank:AF075269           | SIVlhoest  |
| Genbank:L06042             | SIVsyk     |

---
