# Supplementary material for: Identifying recombinants in human and primate immunodeficiency virus sequence alignments using quartet scanning
Source: PubMed Central journal article supplement (PMC2684544; doi:10.1186/1471-2105-10-126), 2009-04-27
Supplement: 1471-2105-10-126-S3.pdf [file 1471-2105-10-126-S3.pdf]

**Additional Table 3. Group ranking for quartet scanning of the CRF02\_AG data set using  $d_{max}$ .**

| Group        | $r_g$ (%) | Group <sup>1</sup> | $r_g$ (%) | Group <sup>2</sup> | $r_g$ (%) | Group <sup>*</sup> | $r_g$ (%) | Group <sup>3</sup> | $r_g$ (%) | Group <sup>4</sup> | $r_g$ (%) | Group <sup>**</sup> | $r_g$ (%) | Group <sup>5</sup> | $r_g$ (%) | Group <sup>***</sup> | $r_g$ (%) |
|--------------|-----------|--------------------|-----------|--------------------|-----------|--------------------|-----------|--------------------|-----------|--------------------|-----------|---------------------|-----------|--------------------|-----------|----------------------|-----------|
| G (4)        | 100.0     | K (2)              | 100.0     | A (4)              | 100.0     | A1 (1)             | 100.0     | J (2)              | 100.0     | D (4)              | 100.0     | DNDK (1)            | 100.0     | F (4)              | 100.00    | F1BR02 (1)           | 100.00    |
| CRF02_AG (4) | 97.6      | A (4)              | 98.9      | D (4)              | 98.9      | A4 (1)             | 97.6      | F (4)              | 99.6      | F (4)              | 99.8      | DELI (1)            | 99.8      | C (4)              | 99.73     | F2MP25 (1)           | 99.75     |
| J (2)        | 97.4      | D (4)              | 98.2      | J (2)              | 98.7      | A3 (1)             | 95.8      | D (4)              | 99.5      | H (3)              | 99.6      | DZR085 (1)          | 99.8      | H (3)              | 99.69     | F2MP25 (1)           | 99.74     |
| A (4)        | 96.0      | J (2)              | 98.0      | C (4)              | 98.2      | D (4)              | 95.3      | H (3)              | 98.9      | A2 (1)             | 99.0      | F (4)               | 98.9      | CRF02_AG (4)       | 99.32     | F1MP41 (1)           | 97.09     |
| K (2)        | 95.3      | F (4)              | 97.7      | CRF02_AG (4)       | 98.2      | J (2)              | 94.7      | C (4)              | 98.7      | C (4)              | 99.0      | H (3)               | 98.4      | B (4)              | 99.25     | H (3)                | 96.66     |
| F (4)        | 94.8      | C (4)              | 97.3      | F (4)              | 98.0      | A2 (1)             | 94.5      | A2 (4)             | 98.3      | CRF02_AG (4)       | 98.7      | A2 (1)              | 98.0      | DUG11 (1)          | 98.66     | C (4)                | 96.10     |
| D (4)        | 94.3      | CRF02_AG (4)       | 97.2      | B (4)              | 97.4      | C (4)              | 94.4      | B (4)              | 98.0      | B (4)              | 98.3      | C (4)               | 97.8      | A2 (1)             | 98.44     | CRF02_AG (4)         | 95.66     |
| H (3)        | 93.0      | B (4)              | 96.6      | H (3)              | 97.2      | CRF02_AG (4)       | 94.4      | CRF02_AG (4)       | 97.8      |                    |           | CRF02_AG (4)        | 97.4      |                    |           | A2 (1)               | 95.62     |
| C (4)        | 92.5      | H (3)              | 96.2      |                    |           | F (4)              | 94.1      |                    |           |                    |           | B (4)               | 97.0      |                    |           | B (4)                | 95.49     |
| B (4)        | 92.4      |                    |           |                    |           | B (4)              | 93.8      |                    |           |                    |           | DUG11 (1)           | 95.5      |                    |           | DUG11 (1)            | 94.76     |
|              |           |                    |           |                    |           | H (3)              | 93.4      |                    |           |                    |           |                     |           |                    |           |                      |           |

The number of sequences per group is indicated between brackets. <sup>1-5</sup> The group ranking based on  $d_{max}$  was generated after sequential exclusion of the subtype G sequences<sup>1</sup>, subtype K sequences<sup>2</sup>, subsubtype A1, A3 and A4 sequences<sup>3</sup>, subtype J sequences<sup>4</sup> and subtype D sequences<sup>5</sup> (NDK, ELI and ZR085). <sup>\*</sup>, <sup>\*\*</sup>, <sup>\*\*\*</sup> Group ranking after removing the grouping constraint for subtype A<sup>\*</sup>, subtype D<sup>\*\*</sup> and subtype F<sup>\*\*\*</sup>. All permutation  $p$ -values were  $< 0.01$ ; after excluding the subtype F sequences no significant recombination was detected ( $p = 0.19$ )
