# Supplementary material for: Identifying recombinants in human and primate immunodeficiency virus sequence alignments using quartet scanning
Source: PubMed Central journal article supplement (PMC2684544; doi:10.1186/1471-2105-10-126), 2009-04-27
Supplement: 1471-2105-10-126-S4.pdf [file 1471-2105-10-126-S4.pdf]

**Additional Table A4. Group ranking for quartet scanning of the CRF02\_AG data set using  $d_{av}$ .**

| Group        | $r_g$ (%) | Group <sup>1</sup> | $r_g$ (%) | Group <sup>2</sup> | $r_g$ (%) | Group <sup>*</sup> | $r_g$ (%) | Group <sup>3</sup> | $r_g$ (%) | Group <sup>4</sup> | $r_g$ (%) | Group <sup>**</sup> | $r_g$ (%) | Group <sup>5</sup> | $r_g$ (%) | Group <sup>***</sup> | $r_g$ (%) |
|--------------|-----------|--------------------|-----------|--------------------|-----------|--------------------|-----------|--------------------|-----------|--------------------|-----------|---------------------|-----------|--------------------|-----------|----------------------|-----------|
| G (4)        | 100.0     | K (2)              | 100.0     | A (4)              | 100.0     | A1 (1)             | 100.0     | D (4)              | 100.0     | DNDK (1)           | 100.0     | DZR085 (1)          | 100.0     | F (4)              | 100.0     | F2MP25 7 (1)         | 100.0     |
| CRF02_AG (4) | 98.0      | A (4)              | 99.3      | D (4)              | 98.0      | A3 (1)             | 97.2      | F (4)              | 99.8      | DELI (1)           | 99.4      | J (2)               | 99.4      | H (3)              | 99.6      | F1BR (1)             | 98.4      |
| J (2)        | 96.0      | D (4)              | 98.0      | CRF02_AG (4)       | 98.0      | A4 (1)             | 96.4      | H (3)              | 99.6      | F (4)              | 99.1      | F (4)               | 99.2      | J (2)              | 98.7      | F2MP25 5 (1)         | 98.1      |
| A (4)        | 95.2      | CRF02_AG (4)       | 97.81     | F (4)              | 97.3      | D (4)              | 94.2      | B (4)              | 99.1      | DZR085 (1)         | 98.9      | H (3)               | 98.4      | B (4)              | 98.6      | F1MP4 (1)            | 97.3      |
| K (2)        | 94.4      | F (4)              | 97.1      | C (4)              | 97.0      | CRF02_AG (4)       | 93.8      | J (2)              | 98.9      | H (3)              | 98.4      | C (4)               | 98.4      | DUG114 (1)         | 98.4      | J (2)                | 96.6      |
| F (4)        | 93.2      | C (4)              | 96.6      | B (4)              | 96.7      | F (4)              | 93.3      | A2 (1)             | 98.7      | A2 (1)             | 98.0      | B (4)               | 98.1      | A2 (1)             | 98.2      | H (3)                | 96.4      |
| D (4)        | 93.1      | B (4)              | 96.5      | H (3)              | 96.6      | C (4)              | 93.3      | C (4)              | 98.4      | B (4)              | 97.9      | CRF02_AG (4)        | 97.6      | C (4)              | 98.1      | C (4)                | 95.6      |
| H (3)        | 92.2      | J (2)              | 96.4      | J (2)              | 96.1      | A2 (1)             | 93.3      | CRF02_AG (4)       | 97.4      | J (2)              | 97.8      | A2 (1)              | 97.5      | CRF02_AG (4)       | 98.0      | A2 (1)               | 95.3      |
| B (4)        | 91.7      | H (3)              | 95.6      |                    |           | B (4)              | 93.1      |                    |           | C (4)              | 97.5      | DUG114 (1)          | 95.9      |                    |           | B (4)                | 95.0      |
| C (4)        | 91.6      |                    |           |                    |           | H (3)              | 92.8      |                    |           | CRF02_AG (4)       | 96.5      |                     |           |                    |           | CRF02_AG (4)         | 94.8      |
|              |           |                    |           |                    |           | J (2)              | 92.4      |                    |           | DUG114 (1)         | 96.2      |                     |           |                    |           | DUG114 (1)           | 93.6      |

The number of sequences per group is indicated between brackets.<sup>1-5</sup> The group ranking based on  $d_{av}$  was generated after sequential exclusion of the subtype G sequences<sup>1</sup>, subtype K sequences<sup>2</sup>, subsubtype A1, A3 and A4 sequences<sup>3</sup> and subtype D sequences<sup>4,5</sup> (DNDK, DELI and DZR085).<sup>\*,\*\*,\*\*\*</sup> Group ranking after removing the cluster constraint for subtype A<sup>\*</sup>, subtype D<sup>\*\*</sup> And subtype F<sup>\*\*\*</sup>. All permutation  $p$ -values were  $< 0.01$ ; after excluding the subtype F sequences no significant recombination was detected ( $p = 0.08$ ).
