# Supplementary material for: Identifying recombinants in human and primate immunodeficiency virus sequence alignments using quartet scanning
Source: PubMed Central journal article supplement (PMC2684544; doi:10.1186/1471-2105-10-126), 2009-04-27
Supplement: 1471-2105-10-126-S6.pdf [file 1471-2105-10-126-S6.pdf]

**File 6. Tree reconstructions and topology tests for *gag*, *pol* and *env* data sets including the DRC lineage.**

Fig. A6. HIV-1 Maximum likelihood trees for the structural genes *gag*, *pol* and *env*. The numbers at the nodes represent the bootstrap support percentages based on 100 replicates. The DRC sequences are indicated with a rectangle.

Table A6. *p*-values for one-sided Kishino-Hasegawa test, the Shimodaira-Hasegawa test and the approximately unbiased test.

*gag*

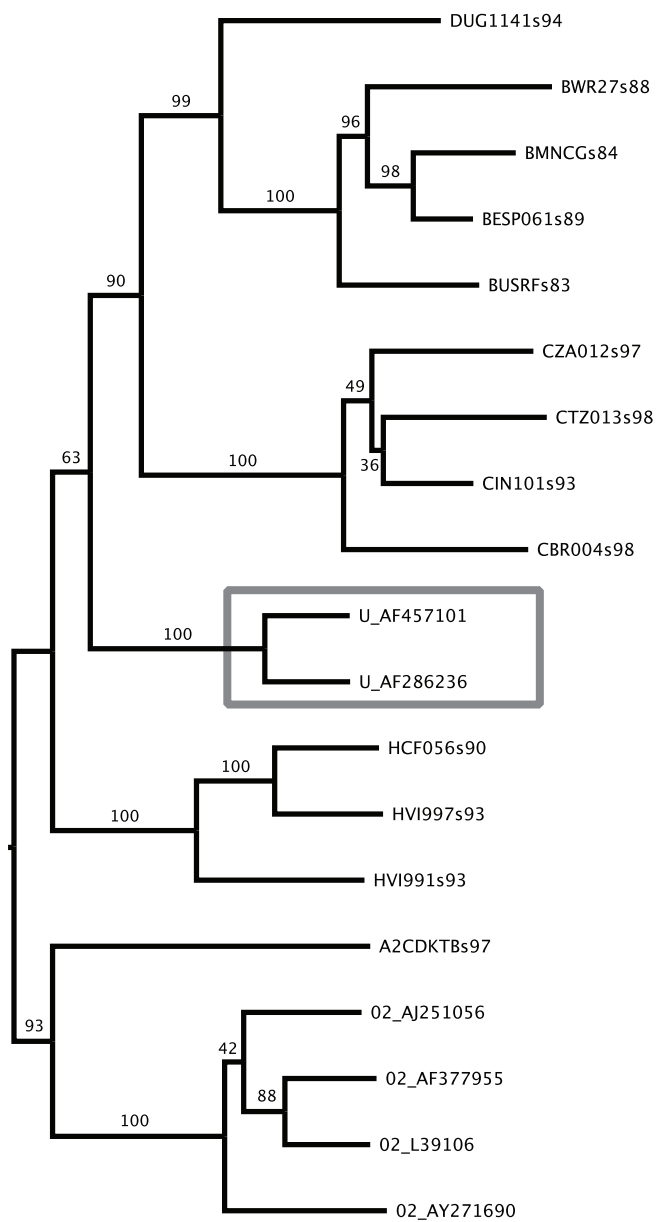

0.02

*pol*

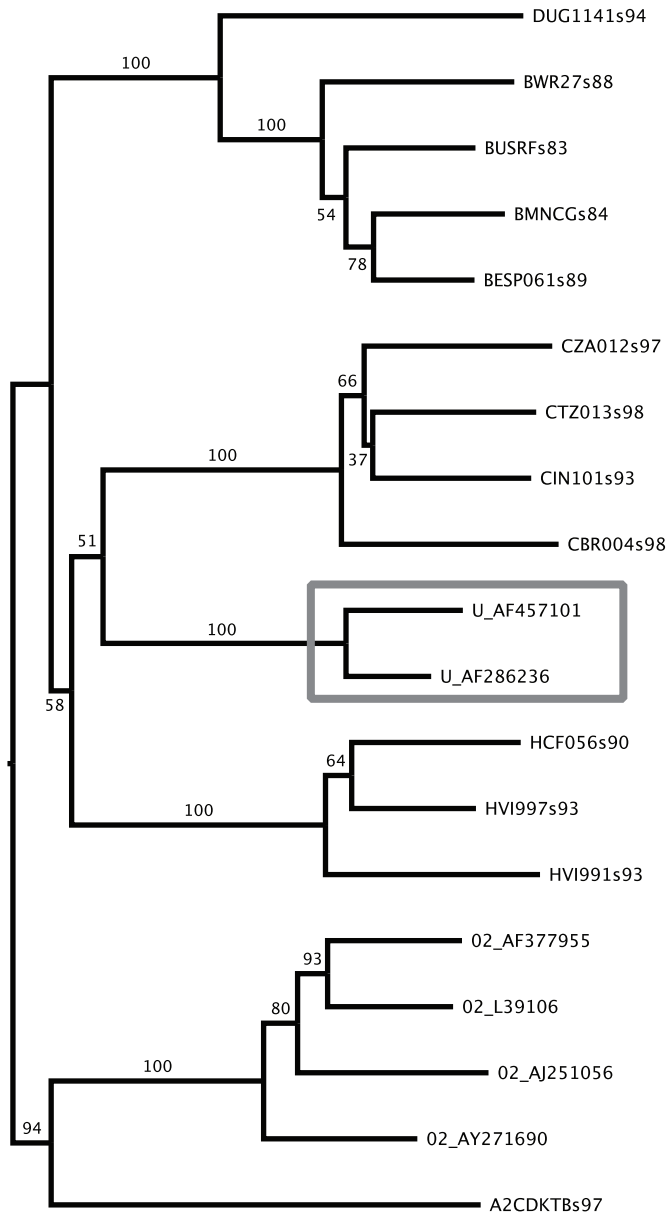

0.02

*env*

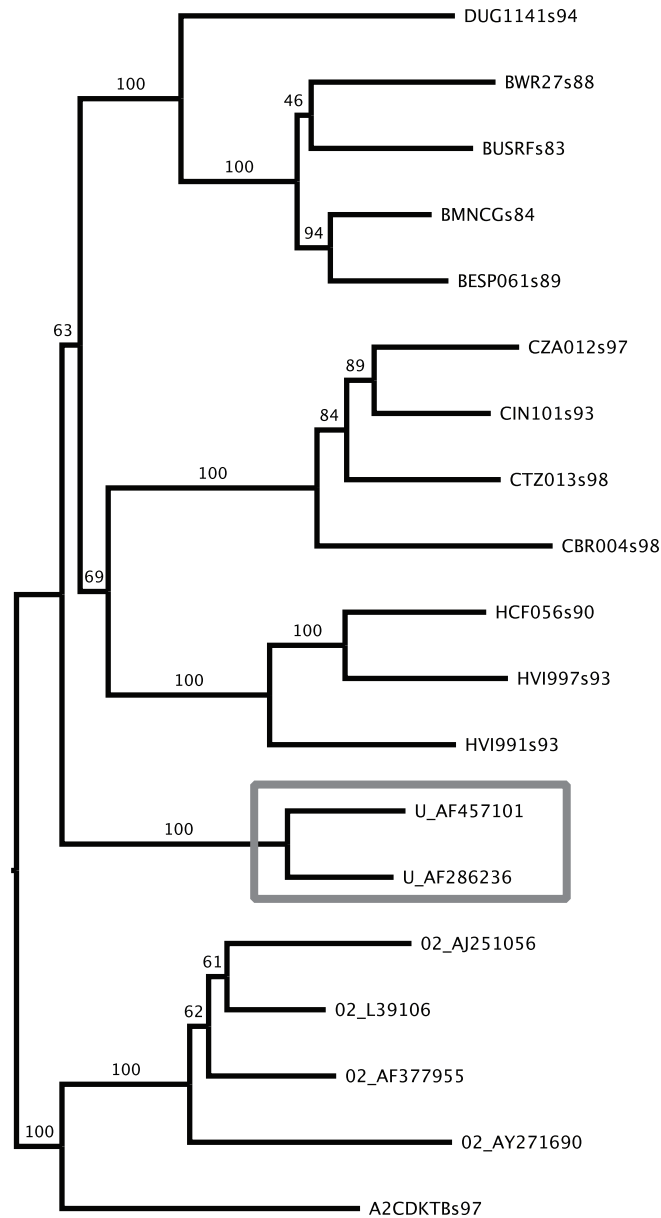

0.02

Table A6. *p*-values for tree incongruence tests

| Tree | Data           |         |         |                |        |        |                |        |        |
|------|----------------|---------|---------|----------------|--------|--------|----------------|--------|--------|
|      | gag            |         |         | pol            |        |        | env            |        |        |
|      | KH             | SH      | AU      | KH             | SH     | AU     | KH             | SH     | AU     |
| gag  | (Best ML tree) |         |         | 0.208          | 0.329  | 0.228  | 0.025*         | 0.026* | 0.035* |
| pol  | 0.006**        | 0.008** | 0.002** | (Best ML tree) |        |        | 0.032*         | 0.021* | 0.027* |
| env  | 0.035*         | 0.039*  | 0.048*  | 0.026*         | 0.030* | 0.017* | (Best ML tree) |        |        |

KH, one-sided Kishino-Hasegawa test; SH, Shimodaira-Hasegawa test; AU, approximately unbiased test. \* significant at the 0.05 level; \*\* significant at the 0.01 level
