# Supplementary material for: Identifying recombinants in human and primate immunodeficiency virus sequence alignments using quartet scanning
Source: PubMed Central journal article supplement (PMC2684544; doi:10.1186/1471-2105-10-126), 2009-04-27
Supplement: 1471-2105-10-126-S7.pdf [file 1471-2105-10-126-S7.pdf]

**Table A7. Group ranking based on quartet scanning of HIV-1 group M including a CRF02\_AE.**

| Groups <sup>4</sup> | $r_g$ (%) |
|---------------------|-----------|
| CRF02_AE (4)        | 100.0     |
| CRF02_AG (4)        | 99.4      |
| B (4)               | 94.9      |
| C (4)               | 94.8      |
| A2 (1)              | 92.0      |
| DUG114 (1)          | 92.0      |
| H (3)               | 89.9      |

The number of sequences per group is indicated between brackets. The permutation  $p$ -value  $< 0.01$  was based on  $d_{max}$ .
