# Supplementary material for: Identifying recombinants in human and primate immunodeficiency virus sequence alignments using quartet scanning
Source: PubMed Central journal article supplement (PMC2684544; doi:10.1186/1471-2105-10-126), 2009-04-27
Supplement: 1471-2105-10-126-S8.pdf [file 1471-2105-10-126-S8.pdf]

**Additional Table A8. Taxon ranking for quartet scanning of primate immunodeficiency viruses using  $d_{max}$ .**

| Taxa        | $r_t(\%)$ | Taxa <sup>1</sup> | $r_t(\%)$ | Taxa <sup>2</sup> | $r_t(\%)$ | Taxa <sup>3</sup> | $r_t(\%)$ | Taxa <sup>4</sup> | $r_t(\%)$ | Taxa <sup>5</sup> | $r_t(\%)$ |
|-------------|-----------|-------------------|-----------|-------------------|-----------|-------------------|-----------|-------------------|-----------|-------------------|-----------|
| SIVcpzUS    | 100.0     | SIVagm155         | 100.0     | SIVcolCGU         | 100.0     | SIVmndGB1         | 100.0     | SIVsyk173         | 100.0     | SIVsm543          | 100.0     |
| SIVcpzTan1  | 99.2      | SIVagmTAN1        | 96.5      | SIVmndGB1         | 98.3      | SIVsyk173         | 99.3      | SIVsm543          | 94.9      | HIV2D205          | 97.7      |
| SIVagm155   | 96.3      | SIVmndGB1         | 95.0      | SIVsm543          | 96.2      | SIVsm543          | 99.1      | HIV2D205          | 94.6      | SIVrcmNigM        | 94.0      |
| SIVagmTAN1  | 95.5      | HIV2D205          | 94.8      | SIVlhoest7G       | 96.2      | SIVlhoest7G       | 98.4      | SIVrcmGB1         | 90.0      | SIVrcmGB1         | 90.6      |
| SIVsm543    | 93.9      | SIVsm543          | 94.3      | SIVsyk173         | 96.0      | SIVrcmNigM        | 98.3      | SIVrcmNigM        | 88.9      | SIVgsn71          | 85.5      |
| SIVmndGB1   | 93.8      | SIVcolCGU         | 94.2      | HIV2D205          | 95.0      | HIV2D205          | 97.7      | SIVgsn71          | 86.0      | SIVgsn166         | 84.1      |
| SIVrcmNigM  | 93.8      | SIVsyk173         | 94.1      | SIVrcmNigM        | 91.6      | SIVrcmGB1         | 93.3      | SIVgsn166         | 82.2      |                   |           |
| HIV2D205    | 93.5      | SIVlhoest7G       | 92.1      | SIVrcmGB1         | 90.0      | SIVgsn71          | 88.5      |                   |           |                   |           |
| SIVsyk173   | 92.9      | SIVrcmNigM        | 88.5      | SIVgsn71          | 87.3      | SIVgsn166         | 85.5      |                   |           |                   |           |
| SIVrcmGB1   | 92.7      | SIVrcmGB1         | 87.3      | SIVgsn166         | 85.2      |                   |           |                   |           |                   |           |
| SIVlhoest7G | 91.6      | SIVgsn71          | 85.6      |                   |           |                   |           |                   |           |                   |           |
| SIVcolCGU   | 89.9      | SIVgsn166         | 85.1      |                   |           |                   |           |                   |           |                   |           |
| SIVgsn71    | 88.9      |                   |           |                   |           |                   |           |                   |           |                   |           |
| SIVgsn166   | 88.4      |                   |           |                   |           |                   |           |                   |           |                   |           |

<sup>1-5</sup> The taxon ranking based on  $d_{max}$  was generated after sequential exclusion of SIVcpzUS and SIVcpzTan1<sup>1</sup>, SIVagm155 and SIVagmTAN1<sup>2</sup>, SIVcolCGU<sup>3</sup>, SIVmndGB14 and SIVlhoest7G<sup>4</sup> (although SIVlhoest7G was not immediately ranked after SIVmndGB14, it was the top ranked taxon after deletion of SIVmndGB14), SIVsyk173<sup>5</sup>. All permutation  $p$ -values were  $< 0.01$ .
