# Supplementary material for: Identifying recombinants in human and primate immunodeficiency virus sequence alignments using quartet scanning
Source: PubMed Central journal article supplement (PMC2684544; doi:10.1186/1471-2105-10-126), 2009-04-27
Supplement: 1471-2105-10-126-S9.pdf [file 1471-2105-10-126-S9.pdf]

**Additional Table A9. Taxon ranking for quartet scanning of primate immunodeficiency viruses using  $d_{av}$ .**

| Taxa       | $r_t(\%)$ | Taxa <sup>1</sup> | $r_t(\%)$ | Taxa <sup>2</sup> | $r_t(\%)$ | Taxa <sup>3</sup> | $r_t(\%)$ | Taxa <sup>4</sup> | $r_t(\%)$ | Taxa <sup>5</sup> | $r_t(\%)$ |
|------------|-----------|-------------------|-----------|-------------------|-----------|-------------------|-----------|-------------------|-----------|-------------------|-----------|
| SIVcpzTan1 | 100.00    | SIVagmTAN1        | 100.00    | SIVmndGB1         | 100.00    | SIVsyk173         | 100.00    | SIVcolCGU         | 100.00    | HIV2D205          | 100.00    |
| SIVcpzUS   | 98.17     | SIVagm155         | 99.40     | SIVlhost7G        | 99.04     | SIVcolCGU         | 99.73     | HIV2D205          | 94.00     | SIVsm543          | 99.77     |
| SIVagmTAN1 | 92.48     | SIVmndGB1         | 98.58     | SIVcolCGU         | 97.86     | SIVsm543          | 93.99     | SIVsm543          | 93.39     | SIVrcmNigM        | 96.90     |
| SIVagm155  | 91.84     | SIVcolCGU         | 95.70     | SIVsyk173         | 96.86     | HIV2D205          | 92.27     | SIVrcmGB1         | 92.32     | SIVrcmGB1         | 95.69     |
| SIVrcmNigM | 90.66     | SIVlhost7G        | 95.41     | SIVsm543          | 94.35     | SIVrcmGB1         | 89.87     | SIVrcmNigM        | 91.73     | SIVgsn166         | 85.40     |
| SIVmndGB1  | 90.55     | SIVsyk173         | 95.27     | SIVrcmNigM        | 92.62     | SIVrcmNigM        | 89.52     | SIVgsn166         | 81.75     | SIVgsn71          | 83.86     |
| SIVsyk173  | 89.93     | SIVsm543          | 94.39     | HIV2D205          | 91.82     | SIVgsn71          | 84.15     | SIVgsn71          | 79.57     |                   |           |
| SIVsm543   | 88.77     | HIV2D205          | 92.04     | SIVrcmGB1         | 88.57     | SIVgsn166         | 82.97     |                   |           |                   |           |
| SIVlhost7G | 88.37     | SIVrcmNigM        | 90.06     | SIVgsn71          | 84.91     |                   |           |                   |           |                   |           |
| SIVrcmGB1  | 88.04     | SIVrcmGB1         | 86.33     | SIVgsn166         | 84.04     |                   |           |                   |           |                   |           |
| HIV2D205   | 87.51     | SIVgsn71          | 84.03     |                   |           |                   |           |                   |           |                   |           |
| SIVcolCGU  | 86.78     | SIVgsn166         | 83.50     |                   |           |                   |           |                   |           |                   |           |
| SIVgsn71   | 86.43     |                   |           |                   |           |                   |           |                   |           |                   |           |
| SIVgsn166  | 86.34     |                   |           |                   |           |                   |           |                   |           |                   |           |

<sup>1-5</sup> The taxon ranking was generated after sequential exclusion of SIVcpzUS and SIVcpzTan1<sup>1</sup>, SIVagmTAN1 and SIVagm155<sup>2</sup>, SIVmndGB14 and SIVlhost7G<sup>3</sup>, SIVsyk173<sup>4</sup> and SIVcolCGU<sup>5</sup>. All  $p$ -values were  $< 0.01$ ; after excluding the subtype SIVsm/HIV-2(D205) sequences, no significant recombination was detected ( $p = 0.16$ ).
